# Supplementary material for: Protein design using structure-based residue preferences
Source: PubMed Central journal article supplement (PMC10884402; doi:10.1038/s41467-024-45621-4), 2024-02-22
Supplement: 41467_2024_45621_MOESM3_ESM.pdf [file 41467_2024_45621_MOESM3_ESM.pdf]

## **Description of Additional Supplementary Files:**

**Supplementary Data 1:** Primers used in this study.

**Supplementary Data 2:** Sequence fragments of antitoxin variants designed by CoVES.
